# Supplementary material for: Enriched knowledge representation in biological fields: a case study of literature-based discovery in Alzheimer’s disease
Source: Springer Nature journal article supplement (doi:10.1186/s13326-025-00328-3), 2025-03-20
Supplement: MOESM1 [file 13326_2025_328_MOESM1_ESM.pdf]

PMID: 33723967

Statement: We used electron cryo-microscopy (cryo-EM) to determine the binding sites of APN-1607 in the Alzheimer fold. We identified two major sites in the  $\beta$ -helix of PHFs and SFs and a third major site in the C-shaped cavity of SFs.

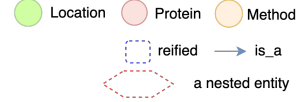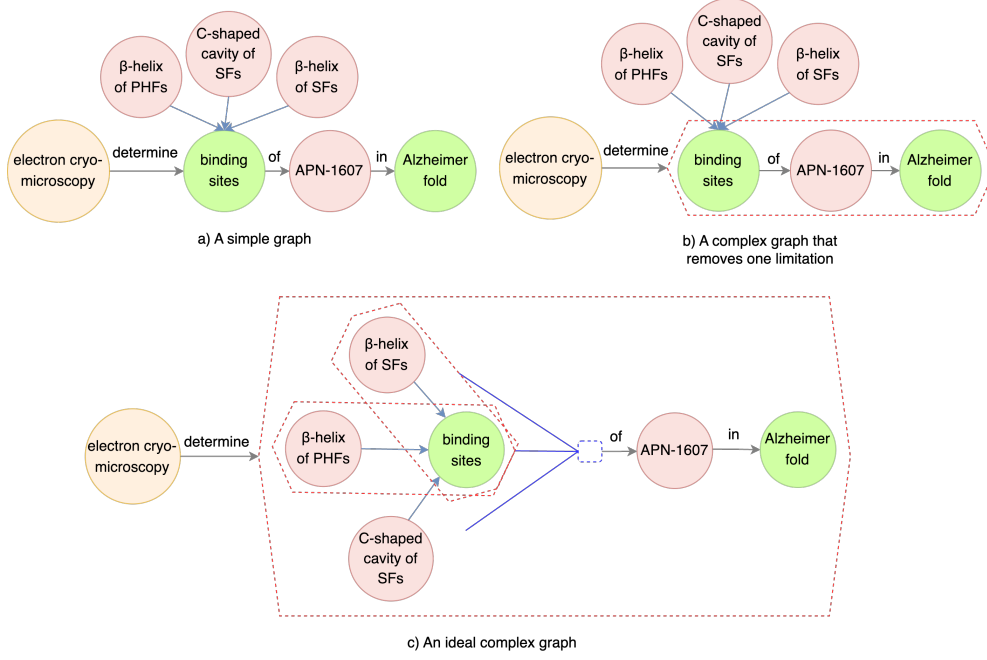

**Fig. 1** A complete illustration of the pairwise relationship limitation type “Lack of context for a general concept”. Top left (a): Each of three major sites ( $\beta$ -helix of PHFs,  $\beta$ -helix of SFs, and C-shaped cavity of SFs) is connected to a general concept **binding sites** with an **is\_a** relation. **binding sites** is an object determined by a tool **electron cryo-microscopy**. Top right (b): One limitation of “Use of a method” (Details in Section ??) is removed with nested relationships. A nested entity of **binding sites of APN-1607 in the Alzheimer fold** is used as an object determined by a tool **electron cryo-microscopy**. Bottom (c): An ideal complex graph that further removes a limitation of “Lack of context for a general concept”. A general concept **binding sites** and its contexts for three major sites are reified as an entity.

PMID: 33933117

Statement: A blood-based diagnostic test incorporating plasma A $\beta$ 42/40 ratio, ApoE proteotype, and age accurately identifies brain amyloid status.

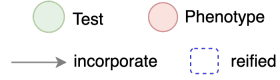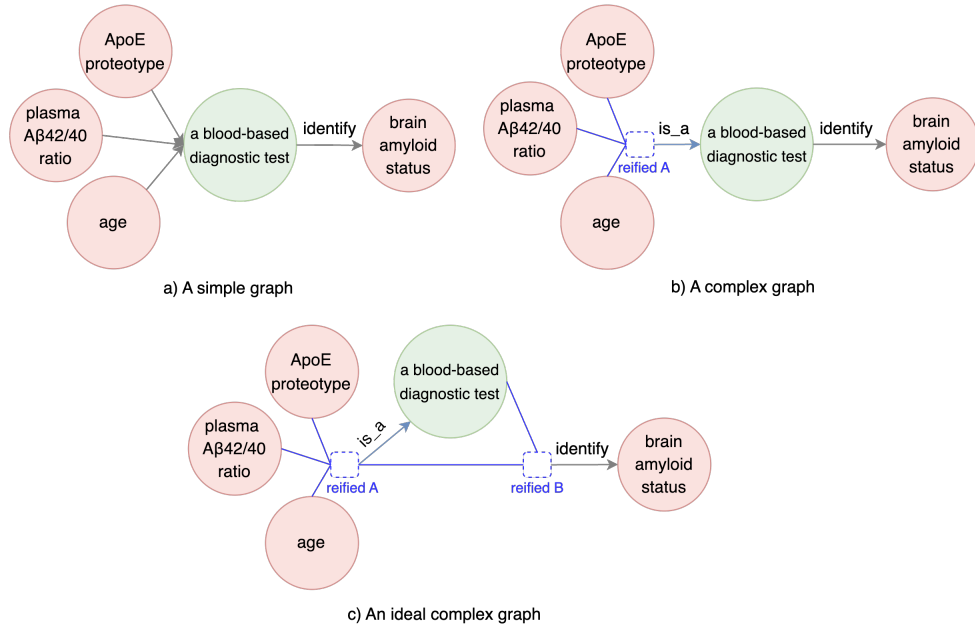

**Fig. 2** A complete illustration of a pairwise relationship limitation type “More than two entities interacting together”. Top left (a): Each of three biomarkers (plasma A $\beta$ 42/40 ratio, ApoE proteotype, and age) is connected to a general concept a blood-based diagnostic test with a relation of incorporate. a blood-based diagnostic test is a subject that identifies brain amyloid status. Top right (b): One limitation of “More than two entities interacting together” is removed with a hypergraph. Three biomarkers are reified as an entity (denoted as reified A). A reified biomarker is linked with a general concept a blood-based diagnostic test with a relation of is\_a. Bottom (c): An ideal complex graph that further removes a limitation of “Lack of context for a general concept” (Details in Section ??). reified A that consists of three biomarkers, as well as a general concept a blood-based diagnostic test are reified as another entity (denoted as reified B). reified B is used as a subject that identifies brain amyloid status.

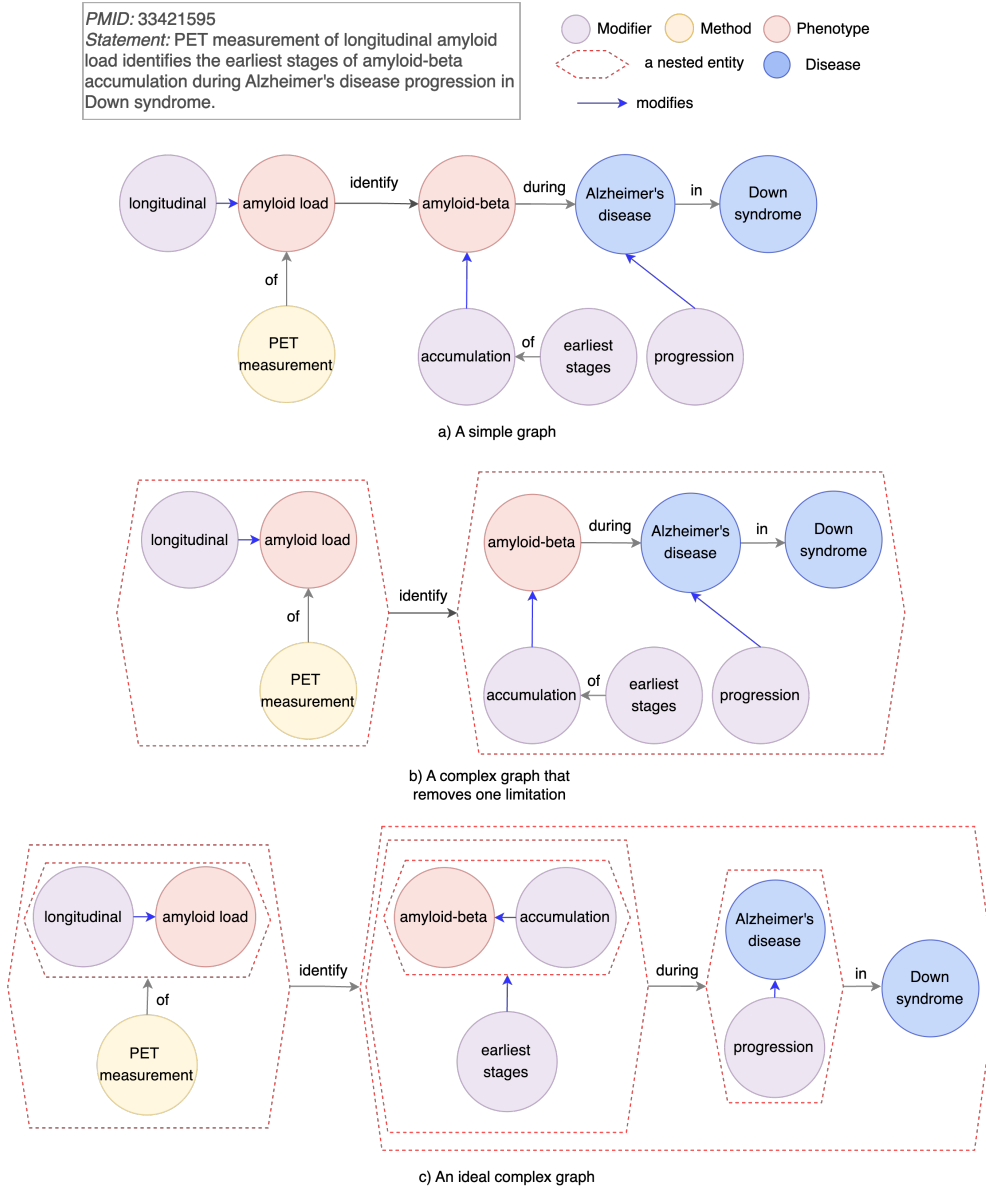

**Fig. 3** A complete illustration of the pairwise relationship limitation type “Mechanism/process from a modified entity”. Top (a): A set of pairwise relationships between modifiers (longitudinal, accumulation, progression, and earliest stages) and corresponding entities (amyloid load, amyloid-beta, Alzheimer’s disease, and earliest stages of amyloid-beta accumulation). amyloid load is used as a subject to identify an object amyloid-beta. Middle (b): One limitation of “A specific context as a constraint” (Details in Section ??) is removed with nested relationships. PET measurement of longitudinal amyloid load is grouped as a subject to identify a grouped object the earliest stages of amyloid-beta accumulation during Alzheimer’s disease progression in Down syndrome. Bottom (c): Modifiers and corresponding entities grouped together as processes (longitudinal amyloid load, amyloid-beta accumulation, Alzheimer’s disease progression, and earliest stages of amyloid-beta accumulation).
